# Supplementary material for: Assessing Drought Frequency and Predictive Climate Analysis in two Biosphere Reserves of Benin (West Africa)
Source: Preprints.org preprint supplement (doi:10.20944/preprints202311.0783.v2), 2023-12-07
Supplement: Supplementary file 3 [file supplementary]

Article

Assessing Drought Frequency and Predictive Climate Analysis in two Biosphere Reserves of Benin (West Africa)

**Supplementary material S1.** Correlation between climatic parameters supporting the figure 3

|  | Temperature | Humidity | Rain |
| --- | --- | --- | --- |
| Temperature | 1.0000000 | 0.4395604 | 0.17582418 |
| Humidity | 0.4395604 | 1.0000000 | 0.50040323 |
| Rain | 0.1758242 | 0.5004032 | 1.00000000 |
